# Supplementary material
Source: Springer Nature journal article supplement (https://www.springermedizin.de/resource/supplementary/12967_2012_1514_MOESM7_ESM.pdf/9574202)

**Anti-CTLA-4 mAb**

**Ipilimumab**

**Anti-S100 mAb**

**METR-ML**

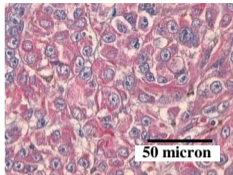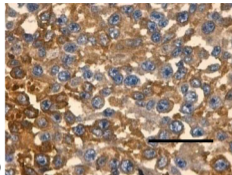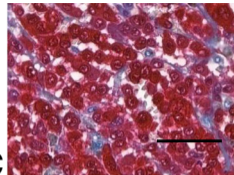

**Isotype controls**

**Anti-CD20 mAb**

**Rituximab**

**H&E**

**METR-ML**

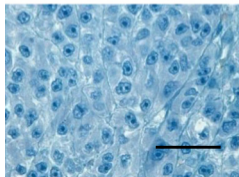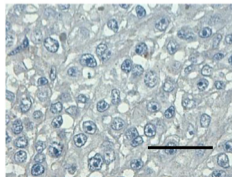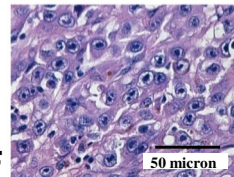

Supplement: MOESM7 [file 9574202]
